# Supplementary material for: Bayesian accuracy estimates for diagnostic tests to detect tuberculosis in captive sun bears (Helarctos malayanus) and Asiatic black bears (Ursus thibetanus) in Cambodia and Vietnam
Source: PLoS One. 2024 Nov 13;19(11):e0313007. doi: 10.1371/journal.pone.0313007 (PMC11560021; doi:10.1371/journal.pone.0313007)
Supplement: S1 Table — (PDF) [file pone.0313007.s001.pdf]

**S1 Table. Seroreactivity pattern description for all DPP VetTB serological test results included the Bayesian latent class analysis (BLCA) and those conducted on serum from culture-confirmed tuberculosis (TB) positive bears at Sites 1 and 2 between February 2016 and March 2023.**

| <b>Line 1<br/>MBP83</b> | <b>Line 2<br/>CFP10/ESAT6</b> | <b>Number of results<br/>included in BLCA</b> | <b>Number of results from<br/>known TB positive<br/>bears*</b> |
|-------------------------|-------------------------------|-----------------------------------------------|----------------------------------------------------------------|
| Strong                  | Strong                        | 4                                             | 7                                                              |
| Strong                  | Weak                          | 6                                             | 2                                                              |
| Strong                  | None                          | 11                                            | 3                                                              |
| Weak                    | Strong                        | 2                                             | 1                                                              |
| Weak                    | Weak                          | 13                                            | 2                                                              |
| Weak                    | None                          | 32                                            | 1                                                              |
| None                    | Strong                        | 6                                             | 6                                                              |
| None                    | Weak                          | 10                                            | 1                                                              |
| None                    | None                          | 260                                           | 5                                                              |
|                         | <b>Total</b>                  | <b>344</b>                                    | <b>28</b>                                                      |

\*not all DPP VetTB results from culture-confirmed tuberculosis positive bears were available for inclusion in the BLCA due to not having an eligible full set of results
